# Supplementary material
Source: ML conference proceedings conference paper supplement (https://aclanthology.org/P19-1380)

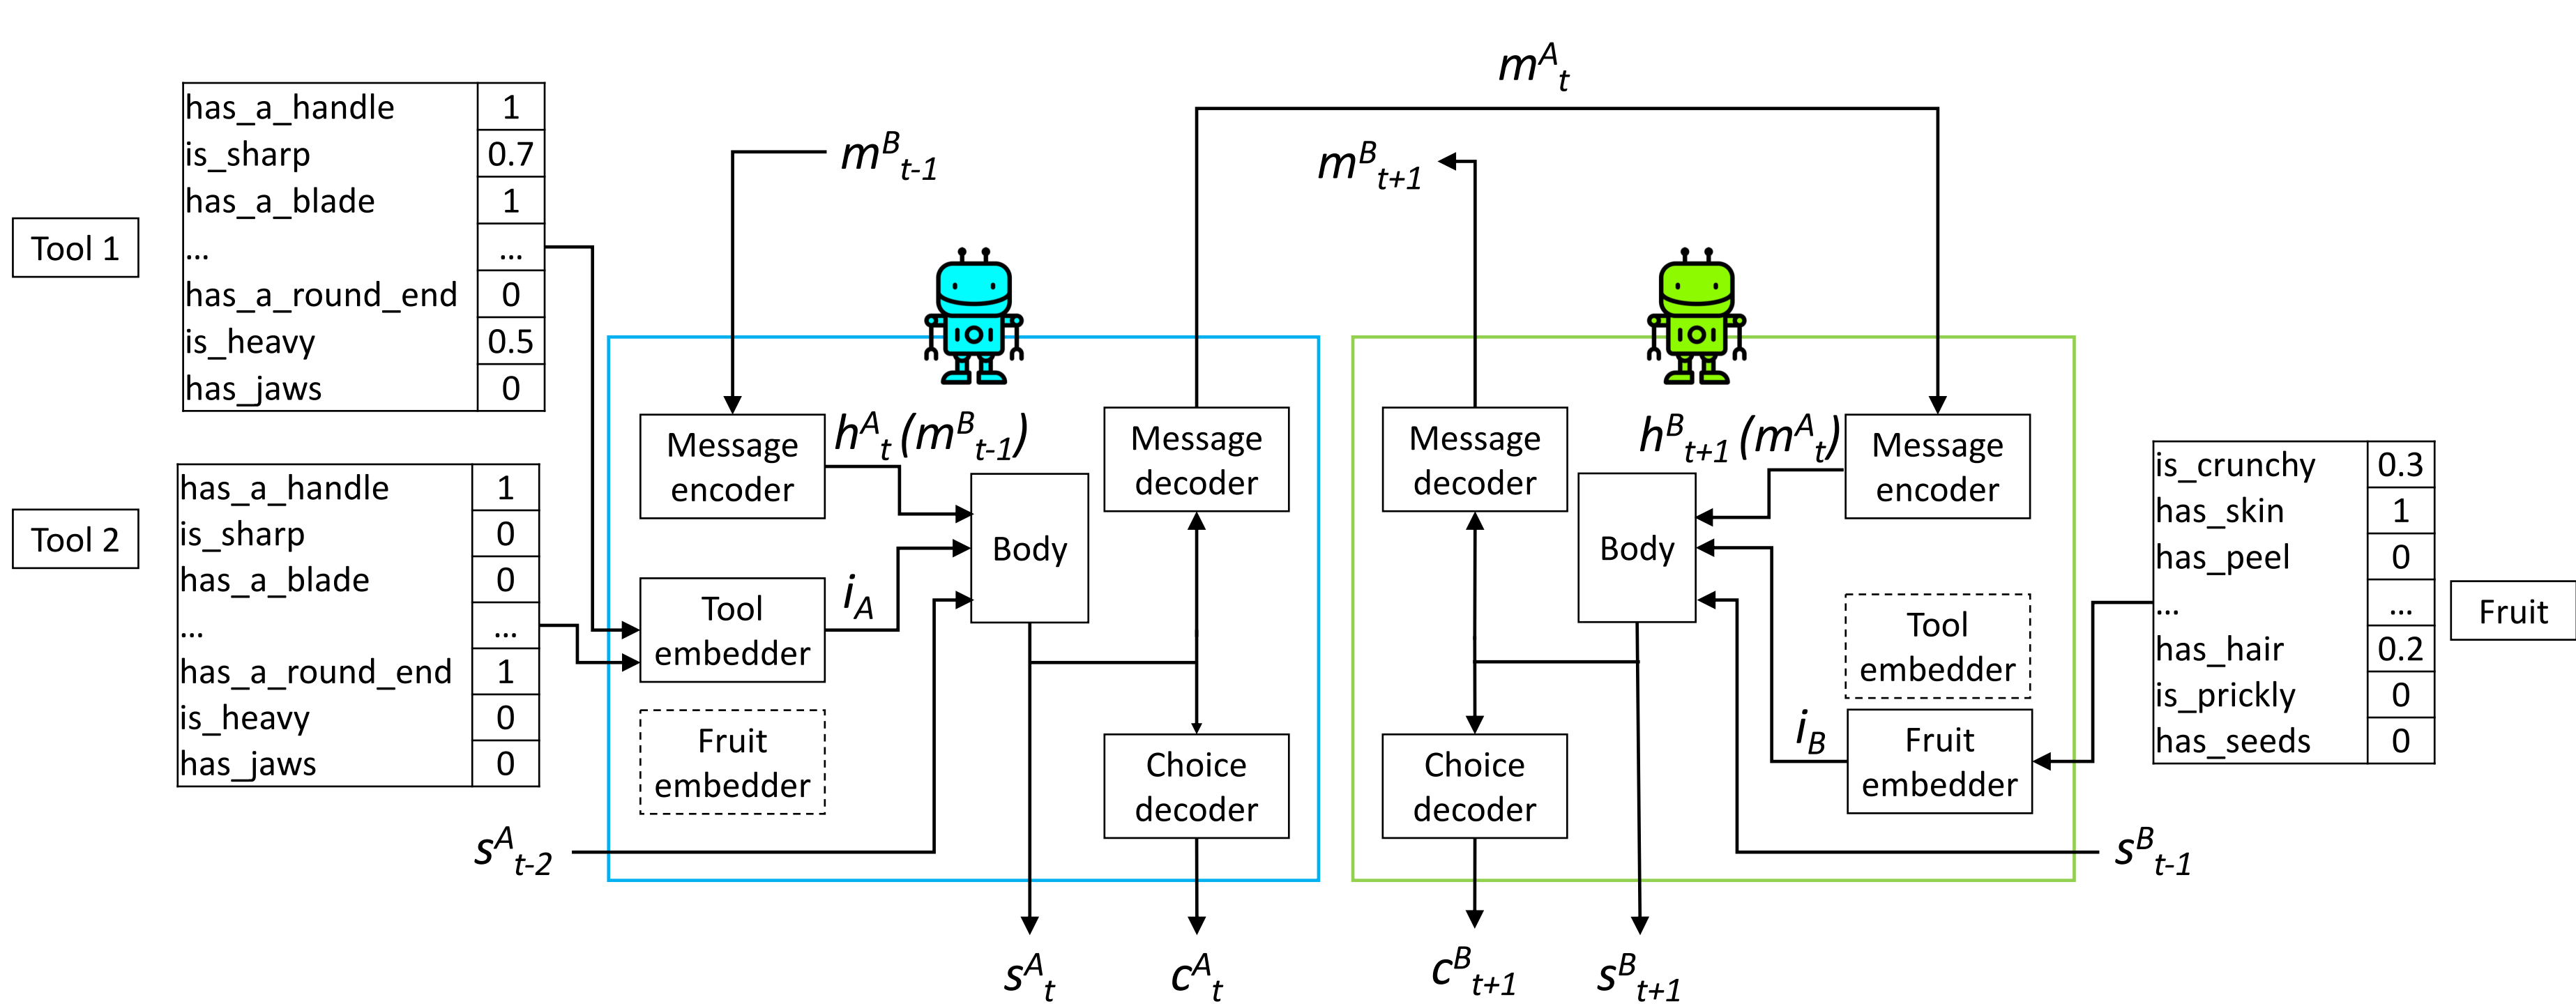

Supplement: Supplementary [file LargeSlide.pdf › source/images/LargeSlide.pdf]
